# Supplementary material
Source: Springer Nature journal article supplement (https://www.springermedizin.de/resource/supplementary/12885_2012_3741_MOESM2_ESM.pdf/9464280)
Supplement: MOESM2 [file 9464280]

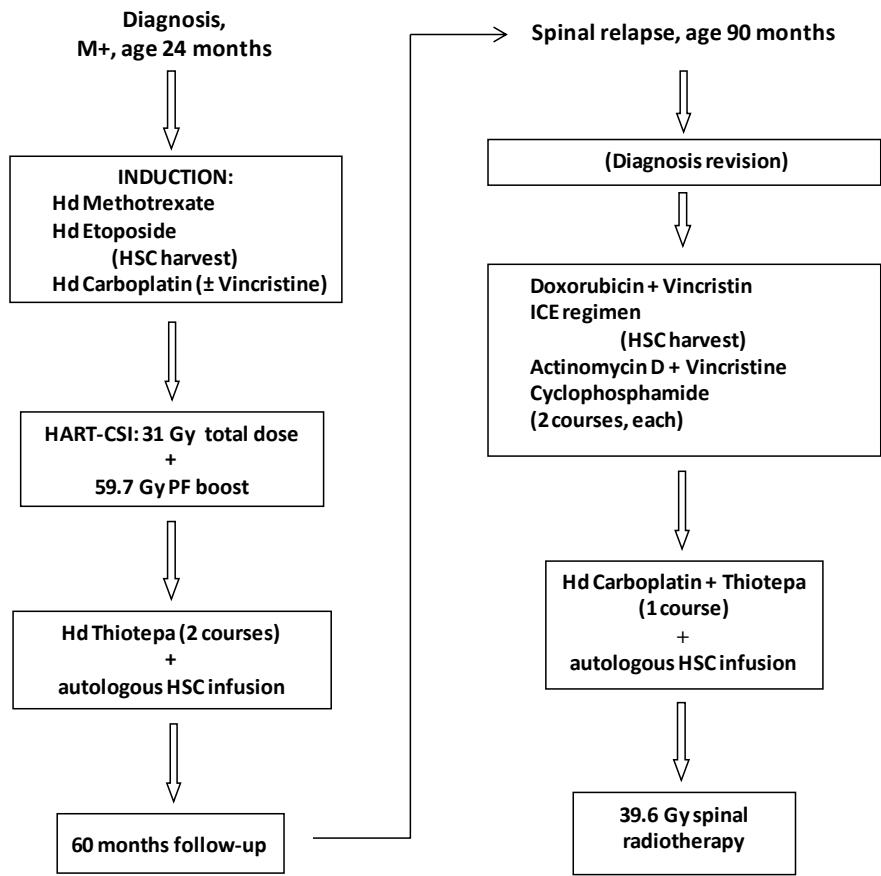

Legend: M+= presence of metastatic lesions; Hd= high dose; HSC= hematopoietic stem cells; HART= hyperfractionated accelerated radiotherapy; CSI= craniospinal irradiation;
